# Supplementary material for: Perception of Animal Abuse among Adolescents: Influence of Social and Demographic Factors
Source: MDPI journal article supplement (doi:10.3390/ani14060972), 2024-03-21
Supplement: s1 [file s1]

**Supplementary File S2.** Demographic characteristics of adolescents studied, in the whole series and segmented according to year of study.

| Variable                     | Whole sample       | Secondary school                |                                  |                                 | High school                     |                                 | P value# |
|------------------------------|--------------------|---------------------------------|----------------------------------|---------------------------------|---------------------------------|---------------------------------|----------|
|                              | (n = 302)<br>n (%) | 3rd degree<br>(n = 88)<br>n (%) | 3rd degree*<br>(n = 18)<br>n (%) | 4th degree<br>(n = 56)<br>n (%) | 1st degree<br>(n = 65)<br>n (%) | 2nd degree<br>(n = 75)<br>n (%) |          |
| Gender                       |                    |                                 |                                  |                                 |                                 |                                 | 0.467    |
| Male                         | 164 (54.3)         | 49 (55.7)                       | 11 (61.1)                        | 26 (46.4)                       | 40 (61.5)                       | 38 (50.7)                       |          |
| Female                       | 138 (45.7)         | 39 (44.3)                       | 7 (38.9)                         | 30 (53.6)                       | 25 (38.5)                       | 37 (49.3)                       |          |
| Age (mean ± SD)              | 15.5 ± 1.2         | 14.2 ± 0.5                      | 14.8 ± 0.4                       | 15.0 ± 0.6                      | 16.0 ± 0.5                      | 17.0 ± 0.3                      | < 0.001† |
| Level of education           |                    |                                 |                                  |                                 |                                 |                                 | —        |
| Secondary school             | 162 (53.6)         | NA                              | NA                               | NA                              | NA                              | NA                              |          |
| High school                  | 140 (46.4)         | NA                              | NA                               | NA                              | NA                              | NA                              |          |
| Habitat                      |                    |                                 |                                  |                                 |                                 |                                 | 0.242    |
| Rural                        | 274 (90.7)         | 79 (89.8)                       | 18 (100)                         | 54 (96.4)                       | 57 (87.7)                       | 66 (88.0)                       |          |
| Urban                        | 92 (9.3)           | 9 (10.2)                        | 0                                | 2 (3.6)                         | 8 (12.3)                        | 9 (12.0)                        |          |
| Family situation             |                    |                                 |                                  |                                 |                                 |                                 | 0.951    |
| Married parents              | 220 (72.8)         | 63 (71.6)                       | 13 (72.2)                        | 40 (71.4)                       | 47 (72.3)                       | 57 (76.0)                       |          |
| Divorced parents             | 64 (21.2)          | 18 (20.5)                       | 3 (16.7)                         | 13 (23.2)                       | 15 (23.1)                       | 15 (20.0)                       |          |
| Others                       | 18 (6.0)           | 7 (8.0)                         | 2 (11.1)                         | 3 (5.4)                         | 3 (4.6)                         | 3 (4.0)                         |          |
| Siblings (yes)               | 244 (80.8)         | 71 (80.7)                       | 16 (88.9)                        | 45 (80.4)                       | 52 (80.0)                       | 60 (80.0)                       | 0.935    |
| Afterscholl activities (yes) | 204 (67.5)         | 60 (68.2)                       | 5 (27.8)                         | 38 (67.9)                       | 46 (70.8)                       | 55 (73.3)                       | 0.006    |
| Type of activity**           |                    |                                 |                                  |                                 |                                 |                                 | 0.039    |
| Intellectual                 | 80 (39.2)          | 28 (46.7)                       | 2 (40.0)                         | 18 (47.4)                       | 9 (19.6)                        | 23 (41.8)                       |          |
| Sports                       | 124 (60.8)         | 32 (53.3)                       | 3 (60.0)                         | 20 (52.6)                       | 37 (80.4)                       | 32 (58.2)                       |          |
| Pets (yes)                   | 228 (75.5)         | 73 (83.0)                       | 15 (83.3)                        | 42 (75.0)                       | 47 (72.3)                       | 51 (68.0)                       | 0.208    |
| Number of pets               |                    |                                 |                                  |                                 |                                 |                                 | 0.807    |
| 1                            | 83 (36.4)          | 27 (37.0)                       | 5 (33.3)                         | 13 (31.0)                       | 19 (40.4)                       | 19 (37.3)                       |          |
| 2                            | 49 (21.5)          | 18 (24.7)                       | 2 (13.3)                         | 9 (21.4)                        | 11 (23.4)                       | 9 (17.6)                        |          |
| 3 – 5                        | 63 (27.6)          | 22 (30.1)                       | 4 (26.7)                         | 12 (28.6)                       | 12 (25.5)                       | 13 (25.5)                       |          |
| ≥6                           | 33 (14.5)          | 6 (8.2)                         | 4 (26.7)                         | 8 (19.0)                        | 5 (10.6)                        | 10 (19.6)                       |          |

|                        |            |           |           |           |           |           |       |
|------------------------|------------|-----------|-----------|-----------|-----------|-----------|-------|
| Number of species      |            |           |           |           |           |           | 0.058 |
| 1                      | 134 (58.8) | 44 (60.3) | 8 (53.3)  | 22 (52.4) | 29 (61.7) | 31 (60.8) |       |
| 2                      | 56 (24.6)  | 20 (27.4) | 7 (46.7)  | 14 (33.3) | 10 (21.3) | 12 (23.5) |       |
| ≥3                     | 38 (16.7)  | 9 (12.3)  | 0         | 6 (14.3)  | 8 (17.0)  | 8 (15.7)  |       |
| Cats (yes)             | 82 (36.0)  | 21 (28.8) | 8 (53.3)  | 17 (40.5) | 20 (42.6) | 16 (31.4) | 0.255 |
| Dogs (yes)             | 166 (72.8) | 49 (67.1) | 12 (80.0) | 30 (71.4) | 35 (74.5) | 40 (78.4) | 0.644 |
| Family hunter (yes)    | 53 (17.5)  | 13 (14.8) | 3 (16.7)  | 6 (10.7)  | 19 (29.2) | 12 (16.0) | 0.074 |
| Family fisherman (yes) | 66 (21.9)  | 22 (25.0) | 4 (22.2)  | 9 (16.1)  | 14 (21.5) | 17 (22.7) | 0.801 |

Abbreviations: SD, standard deviation; NA, not applicable.

\*Subgroup of students with adapted syllabus mainly due to learning difficulty.

\*\*Intellectual afterschool activities include art performance and support classes; sports include soccer, swimming, athletics, gymnastics, and horse riding, among others.

#Chi square test.

†Kruskal-Wallis test.
