# Supplementary material for: Perception of Animal Abuse among Adolescents: Influence of Social and Demographic Factors
Source: MDPI journal article supplement (doi:10.3390/ani14060972), 2024-03-21
Supplement: s1 [file s1]

# ENCUESTA

## NIVEL DE EDUCACIÓN EMOCIONAL EN RELACIÓN A LA PREVENCIÓN DEL MALTRATO ANIMAL

### INFORMACIÓN GENERAL

La presente encuesta está destinada a evaluar el nivel de educación emocional en relación a la prevención del maltrato animal. Forma parte de un Trabajo de Fin de Grado de la Universidad de Las Palmas de Gran Canaria (Facultad de Veterinaria). Está destinada a adolescentes comprendidos entre los 14 y los 17 años: estudiantes de 3º y 4º de ESO, y de 1º y 2º de Bachillerato. Es totalmente ANÓNIMA y VOLUNTARIA.

Te pedimos, por favor, que leas atentamente las preguntas y respondas con libertad y sinceridad. Responde con un 1, si estás totalmente de desacuerdo, en una escala que llega hasta el 5, si estás totalmente de acuerdo con lo que se está preguntando.

Muchísimas gracias por tu colaboración.

### CUESTIONARIO

**Datos demográficos:** rellena los siguientes datos según corresponda

Sexo biológico (hombre/mujer):

Edad (años):

Municipio en el que vives:

Curso:

Entorno en el que vives (rural/urbano):

Tipo de familia (padres casados/padres separados/otros):

Hermanos (sí o no):

Si tienes hermanos, decir la posición que ocupas:

Actividades extraescolares (sí o no):

Si realizas actividades extraescolares, di cuál:

Tienes mascota (sí o no):

Si tienes mascota, decir cuántas:

Si tienes mascota, decir cuáles (perro, gato, conejo, pájaros, reptiles):

¿Algún familiar es cazador? (sí o no):

¿Algún familiar es pescador? (sí o no):

## ENCUESTA DE PREVENCIÓN DE MALTRATO ANIMAL

Contesta a las siguientes preguntas aunque no tengas mascota.

|                                                                                          | Totalmente en<br>desacuerdo<br>(1) | En<br>desacuerdo<br>(2) | Ni de acuerdo ni<br>en desacuerdo<br>(3) | De<br>acuerdo<br>(4) | Totalmente<br>de acuerdo<br>(5) |
|------------------------------------------------------------------------------------------|------------------------------------|-------------------------|------------------------------------------|----------------------|---------------------------------|
| Cuando tengo una mascota en casa y ya no la queremos, lo mejor es dejarla en la calle    |                                    |                         |                                          |                      |                                 |
| Los animales no sienten cuando los golpeas porque son animales                           |                                    |                         |                                          |                      |                                 |
| Los pájaros deben estar en jaulas para que la gente los pueda admirar                    |                                    |                         |                                          |                      |                                 |
| Si veo que a un amigo o familiar le gusta hacer daño a los animales, le reprendo         |                                    |                         |                                          |                      |                                 |
| Cuando tengo una mascota me gusta ser responsable y cuidarla                             |                                    |                         |                                          |                      |                                 |
| En mi casa tratamos bien a los animales                                                  |                                    |                         |                                          |                      |                                 |
| Me gustaría darles agua o comida a los animales de la calle                              |                                    |                         |                                          |                      |                                 |
| Si veo que maltratan a un animal, es mi deber defenderlo                                 |                                    |                         |                                          |                      |                                 |
| En casa me han enseñado que debo respetar a los animales                                 |                                    |                         |                                          |                      |                                 |
| Los animales solo sirven para divertir a las personas                                    |                                    |                         |                                          |                      |                                 |
| Si un animal tiene una enfermedad complicada, lo mejor es deshacerse de él               |                                    |                         |                                          |                      |                                 |
| En mi casa usamos la violencia, si hace falta, para enseñar a la mascota lo que está mal |                                    |                         |                                          |                      |                                 |
| Cuando veo un animal en la calle, quisiera ayudarlo                                      |                                    |                         |                                          |                      |                                 |
| Si no pudiera cuidar a mi mascota, la daría en adopción                                  |                                    |                         |                                          |                      |                                 |
| Los animales de la calle molestan y dan mala imagen a mi ciudad                          |                                    |                         |                                          |                      |                                 |
| Me gustaría apoyar a una institución donde cuiden                                        |                                    |                         |                                          |                      |                                 |

|                                                                                                              |  |  |  |  |  |
|--------------------------------------------------------------------------------------------------------------|--|--|--|--|--|
| animales abandonados                                                                                         |  |  |  |  |  |
| Las peleas entre animales son divertidas                                                                     |  |  |  |  |  |
|                                                                                                              |  |  |  |  |  |
| Me gustaría que se dieran clases sobre cuidado de los animales en mi instituto                               |  |  |  |  |  |
| Tengo la sensación de que los animales están maltratados                                                     |  |  |  |  |  |
| Es normal que mis abuelos enseñaran a los animales pegándoles y no puedo hacer nada porque son de otra época |  |  |  |  |  |
| En casa me enseñan quién manda pegándole a mi mascota                                                        |  |  |  |  |  |
| Un perro se merece más cuidados que una vaca o un pájaro                                                     |  |  |  |  |  |
| Tengo curiosidad por ver una pelea de perros                                                                 |  |  |  |  |  |
| Tengo curiosidad por ver una pelea de gallos                                                                 |  |  |  |  |  |
| Tengo curiosidad por ver una corrida de toros                                                                |  |  |  |  |  |
| Tendría animales disecados en casa                                                                           |  |  |  |  |  |

Muchísimas gracias por tu participación. Dale el cuestionario a tu profesor(a). Cuando terminemos el trabajo de investigación, lo remitiremos a tu instituto para que puedas leer las conclusiones que salgan de este trabajo de investigación.
